# Supplementary material for: Progression of Interstitial Fibrosis and Tubular Atrophy in Low Immunological Risk Renal Transplants Monitored by Sequential Surveillance Biopsies: The Influence of TAC Exposure and Metabolism
Source: PubMed Central journal article supplement (PMC7796060; doi:10.3390/jcm10010141), 2021-01-04
Supplement: jcm-10-00141-s001.pdf [file jcm-10-00141-s001.pdf]

**Table S1.** Correlation matrix of surrogate variables of tacrolimus exposure / metabolism at the time of the first biopsy. TAC-C<sub>0</sub> (ng/mL), tacrolimus trough levels; CV-TAC (%), coefficient of variability of tacrolimus levels; TTR (%), time in therapeutic range; above TR (%), time above therapeutic; below TR (%), time below therapeutic range; C/D (ng/mL/mg), concentration dose ratio.

|                    | TAC-C <sub>0</sub>            | CV-TAC                            | TTR                               | Above TR                      | Below TR        | C/D |
|--------------------|-------------------------------|-----------------------------------|-----------------------------------|-------------------------------|-----------------|-----|
| TAC-C <sub>0</sub> | 1                             |                                   |                                   |                               |                 |     |
| CV-TAC             | <b>-0.226</b><br><b>0.037</b> | 1                                 |                                   |                               |                 |     |
| TTR                | -0.047<br>0.671               | <b>-0.476</b><br><b>&lt;0.001</b> | 1                                 |                               |                 |     |
| Above TR           | 0.158<br>0.148                | <b>0.293</b><br><b>0.006</b>      | <b>-0.863</b><br><b>&lt;0.001</b> | 1                             |                 |     |
| Below TR           | <b>-0.215</b><br><b>0.049</b> | <b>0.338</b><br><b>0.002</b>      | <b>-0.239</b><br><b>0.028</b>     | <b>-0.285</b><br><b>0.008</b> | 1               |     |
| C/D                | 0.161<br>0.142                | 0.052<br>0.639                    | <b>-0.265</b><br><b>0.014</b>     | <b>0.311</b><br><b>0.004</b>  | -0.095<br>0.386 | 1   |

**Table S2.** Correlation matrix of surrogate variables of tacrolimus exposure / metabolism at the time of the second biopsy. TAC-C<sub>0</sub> (ng/mL), tacrolimus trough levels; CV-TAC (%), coefficient of variability of tacrolimus levels; TTR (%), time in therapeutic range; above TR (%), time above therapeutic; below TR (%), time below therapeutic range; C/D (ng/mL/mg), concentration dose ratio.

|                    | TAC-C <sub>0</sub>                | CV-TAC                       | TTR                               | Above TR                      | Below TR        | C/D |
|--------------------|-----------------------------------|------------------------------|-----------------------------------|-------------------------------|-----------------|-----|
| TAC-C <sub>0</sub> | 1                                 |                              |                                   |                               |                 |     |
| CV-TAC             | 0.048<br>0.665                    | 1                            |                                   |                               |                 |     |
| TTR                | <b>-0.427</b><br><b>&lt;0.001</b> | -0.149<br>0.178              | 1                                 |                               |                 |     |
| Above TR           | <b>0.230</b><br><b>0.005</b>      | 0.111<br>0.318               | <b>-0.792</b><br><b>&lt;0.001</b> | 1                             |                 |     |
| Below TR           | <b>-0.222</b><br><b>0.041</b>     | <b>0.229</b><br><b>0.037</b> | -0.027<br>0.809                   | <b>-0.304</b><br><b>0.005</b> | 1               |     |
| C/D                | <b>0.236</b><br><b>0.029</b>      | -0.006<br>0.955              | -0.018<br>0.870                   | -0.005<br>0.962               | -0.091<br>0.405 | 1   |

**Table S3.** Inflammation and tubulitis in areas of interstitial fibrosis / tubular atrophy in the first surveillance biopsy and surrogate variables of tacrolimus exposure / metabolism. TAC-C<sub>0</sub>, tacrolimus trough levels; CV-TAC, coefficient of variability of tacrolimus levels; TTR, time in therapeutic range; above TR, time above therapeutic; below TR, time below therapeutic range; C/D, concentration dose ratio; i-IFTA, Interstitial inflammation in areas of interstitial fibrosis and tubular atrophy; t-IFTA, tubulitis in areas of interstitial fibrosis and tubular atrophy.

|                            | i-IFTA=0 & t-IFTA=0 | i-IFTA ≥1 & t-IFTA=0       | i-IFTA=0 & t-IFTA ≥1       | i-IFTA=1 & t-IFTA ≥1<br>or i-IFTA ≥1 & t-IFTA=1 | i-IFTA ≥2 & t-IFTA ≥2 | p-value |
|----------------------------|---------------------|----------------------------|----------------------------|-------------------------------------------------|-----------------------|---------|
|                            | Normal              | Inflammation w/o tubulitis | Tubulitis w/o inflammation | Borderline changes                              | Chronic TCMR          |         |
| N                          | 31                  | 27                         | 1                          | 24                                              | 2                     |         |
| TAC-C <sub>0</sub> (ng/mL) | 10.0 ± 2.9          | 9.4 ± 2.1                  | 9.2                        | 9.4 ± 2.3                                       | 9.6 ± 1.1             | 0.8815  |
| CV-TAC (%)                 | 31 ± 12             | 30 ± 15                    | 36                         | 32 ± 12                                         | 33 ± 14               | 0.9712  |

|                   |           |           |     |           |         |        |
|-------------------|-----------|-----------|-----|-----------|---------|--------|
| TTR (%)           | 48 ± 18   | 63 ± 22   | 60  | 54 ± 22   | 78 ± 9  | 0.1123 |
| Time above TR (%) | 42 ± 18   | 31 ± 24   | 24  | 32 ± 21   | 20 ± 9  | 0.3659 |
| Time below TR (%) | 10 ± 14   | 6 ± 8     | 16  | 14 ± 16   | 2 ± 0   | 0.1496 |
| C/D (ng/mL/mg)    | 1.8 ± 1.3 | 2.2 ± 1.7 | 1.0 | 2.0 ± 1.4 | 1.7 ± 0 | 0.7546 |

**Table S4.** Inflammation and tubulitis in areas of interstitial fibrosis / tubular atrophy in the second surveillance biopsy and surrogate variables of tacrolimus exposure / metabolism. TAC-C<sub>0</sub>, tacrolimus trough levels; CV-TAC, coefficient of variability of tacrolimus levels; TTR, time in therapeutic range; above TR, time above therapeutic; below TR, time below therapeutic range; C/D, concentration dose ratio; i-IFTA. Interstitial inflammation in areas of interstitial fibrosis and tubular atrophy; t-IFTA, tubulitis in areas of interstitial fibrosis and tubular atrophy.

|                            | i-IFTA=0 & t-IFTA=0 | i-IFTA ≥1 & t-IFTA=0       | i-IFTA=0 & t-IFTA ≥1       | i-IFTA=1 & t-IFTA ≥1<br>or i-IFTA ≥1 & t-IFTA=1 | i-IFTA ≥2 & t-IFTA ≥2 | p-value |
|----------------------------|---------------------|----------------------------|----------------------------|-------------------------------------------------|-----------------------|---------|
|                            | Normal              | Inflammation w/o tubulitis | Tubulitis w/o inflammation | Borderline changes                              | Chronic TCMR          |         |
| N                          | 26                  | 23                         | 2                          | 29                                              | 5                     |         |
| TAC-C <sub>0</sub> (ng/mL) | 8.6 ± 1.8           | 8.2 ± 2.0                  | 6.7 ± 1.5                  | 8.7 ± 2.9                                       | 8.0 ± 1.9             | 0.6952  |
| CV-TAC (%)                 | 18 ± 6              | 17 ± 7                     | 22 ± 0                     | 19 ± 8                                          | 21 ± 8                | 0.7380  |
| TTR (%)                    | 70 ± 27             | 63 ± 30                    | 74 ± 37                    | 62 ± 16                                         | 52 ± 25               | 0.4942  |
| Time above TR (%)          | 29 ± 28             | 33 ± 32                    | 26 ± 37                    | 23 ± 27                                         | 41 ± 34               | 0.6598  |
| Time below TR (%)          | 1 ± 3               | 6 ± 17                     | 19 ± 28                    | 4 ± 7                                           | 8 ± 13                | 0.1149  |
| C/D (ng/mL/mg)             | 2.5 ± 1.1           | 2.1 ± 0.9                  | 1.7 ± 0.8                  | 1.9 ± 1.0                                       | 2.3 ± 0.9             | 0.1898  |
